# Supplementary material for: Octyl Gallate as an Intervention Catalyst to Augment Antifungal Efficacy of Caspofungin
Source: Preprints.org preprint supplement (doi:10.20944/preprints201805.0055.v1), 2018-05-03
Supplement: Supplementary file 1 [file Figure S1-MDPI J.docx]

**
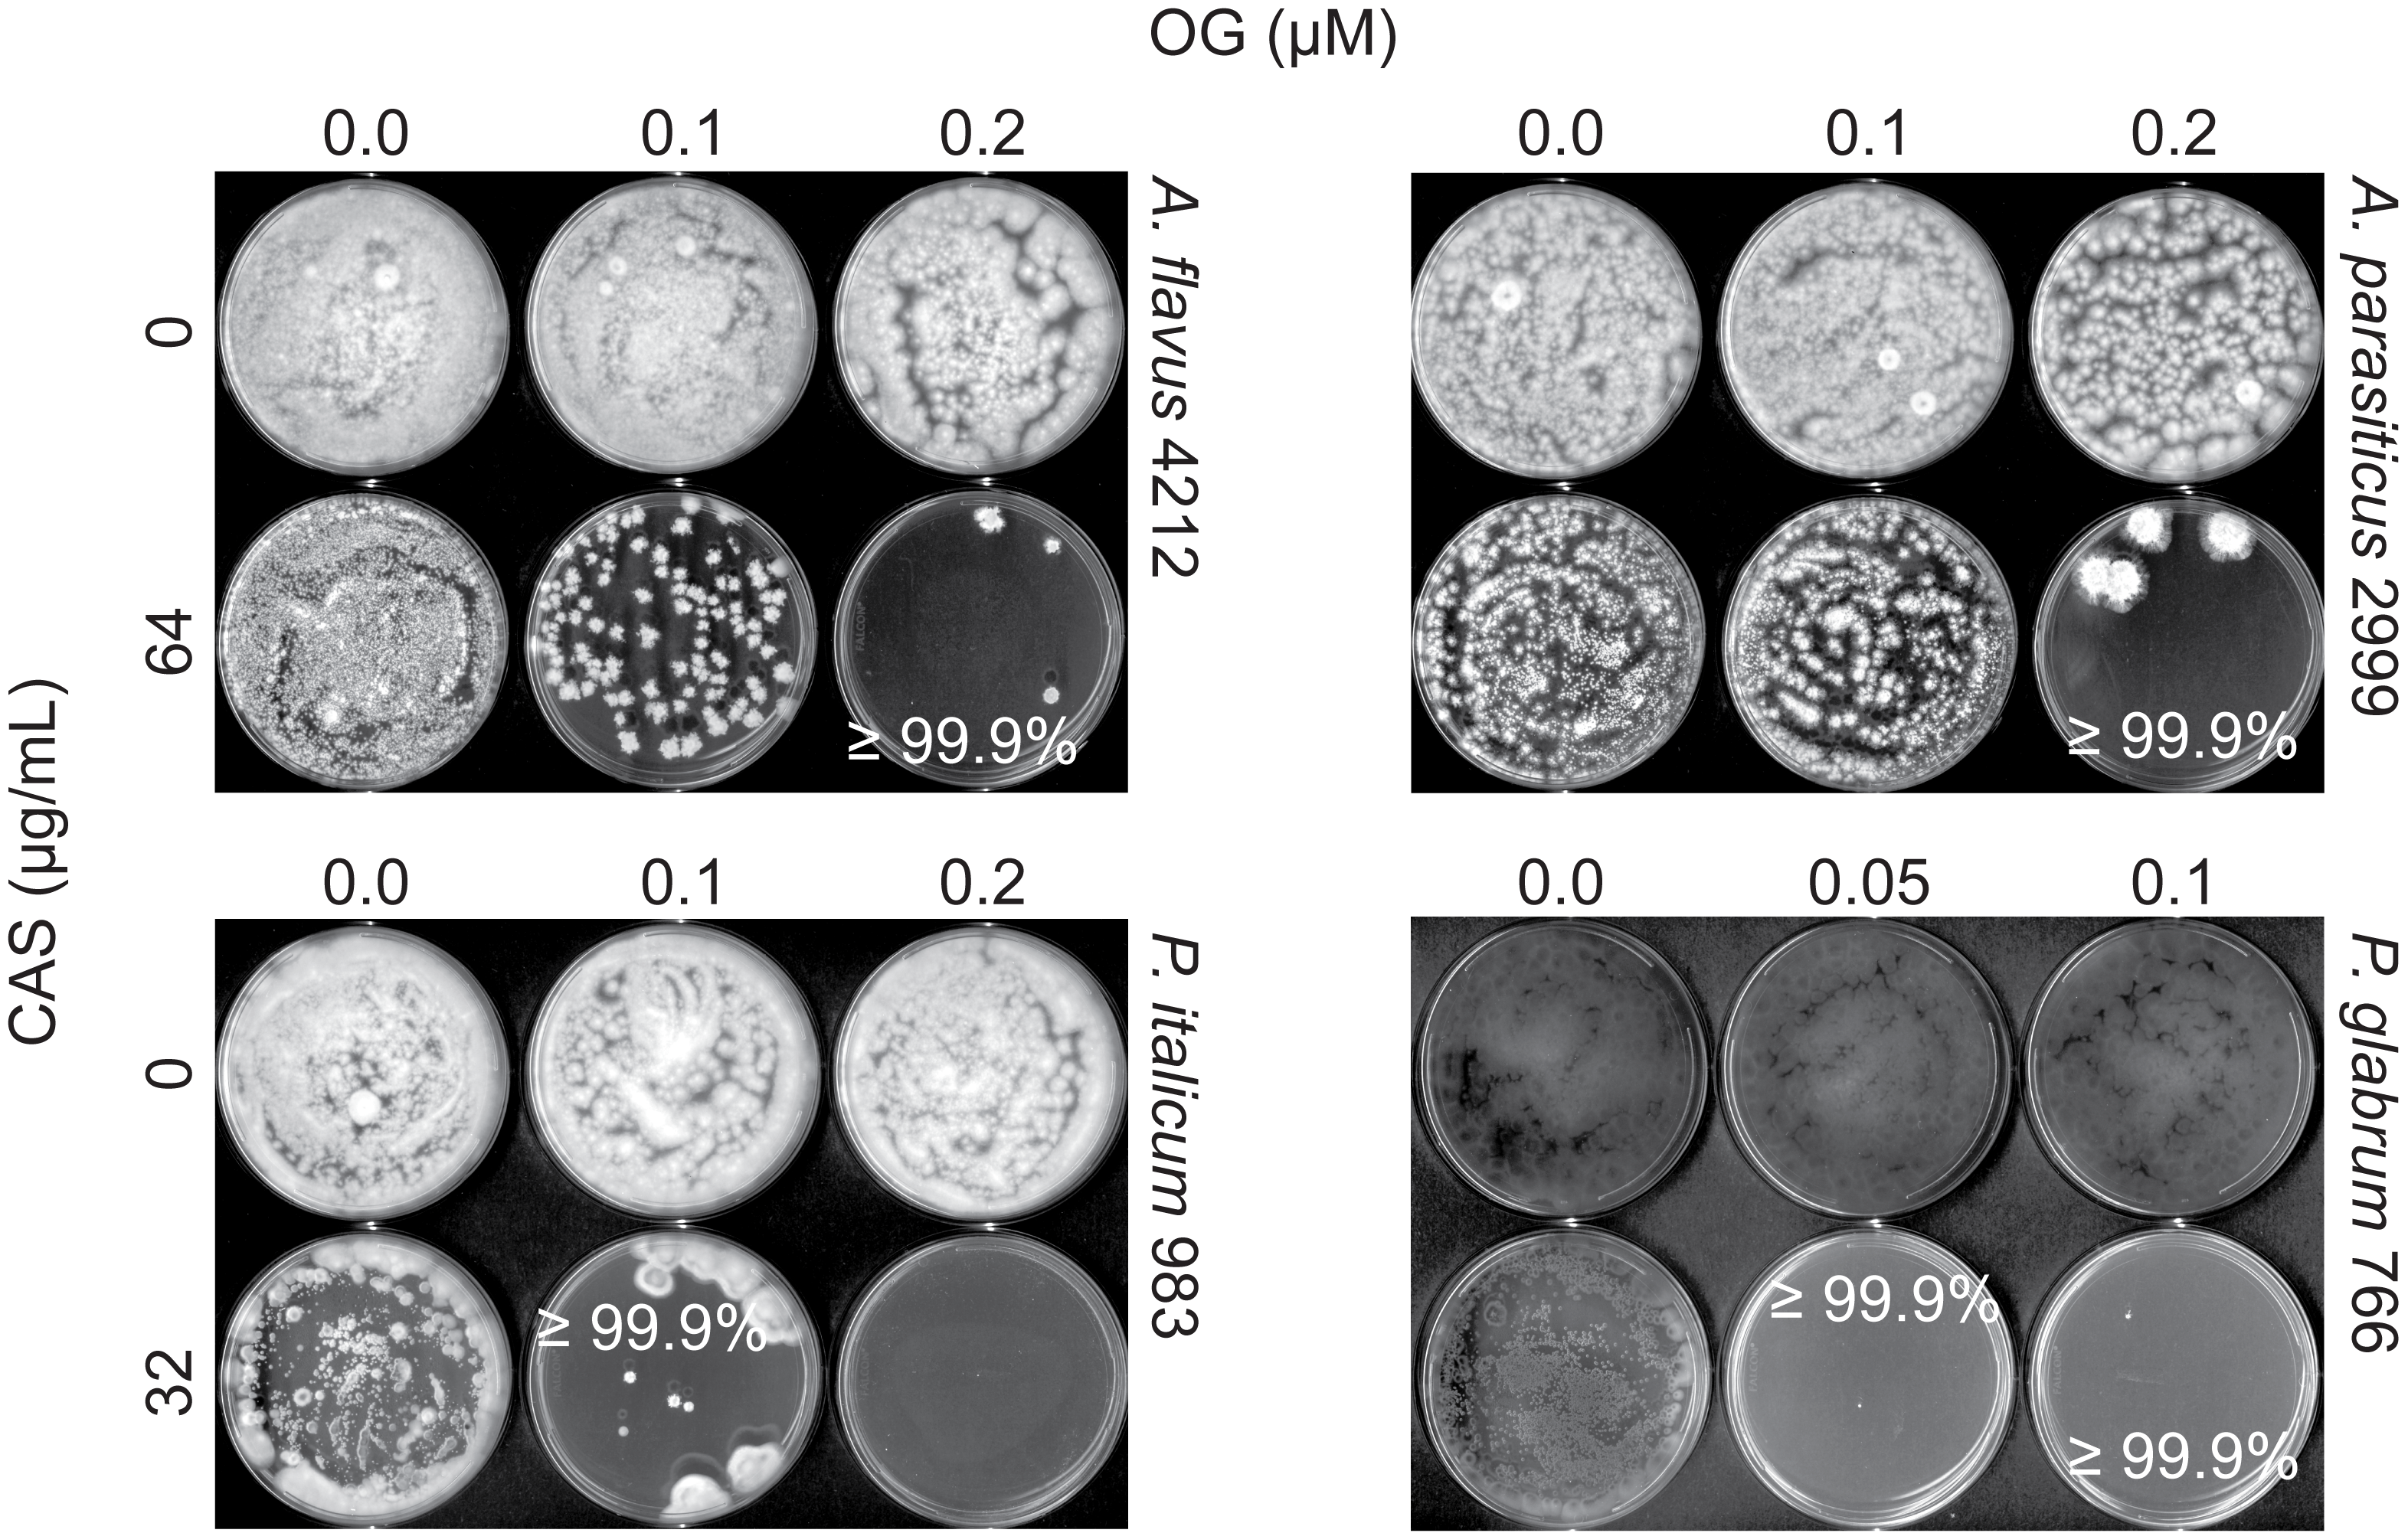
**

**Figure S1.** Chemosensitization test in *A. flavus* 4212, *A. parasiticus* 2999, *P. italicum* 983 and *P. glabrum* 766. Results shown here are the determination of MFCs of antifungal agents (CAS, OG) (The ≥ 99.9% indicates achievement of ≥ 99.9% of fungal death).
