# Supplementary material for: Octyl Gallate as an Intervention Catalyst to Augment Antifungal Efficacy of Caspofungin
Source: Preprints.org preprint supplement (doi:10.20944/preprints201805.0055.v1), 2018-05-03
Supplement: Supplementary file 2 [file Table S1-MDPI J.docx]

**Table S1.** The model yeast *Saccharomyces cerevisiae* strains used in this study.

| ***S. cerevisiae* strains** | **Functions of deleted genes in cell wall integrity** | **Source** |
| --- | --- | --- |
| BY4741 (WT) | Parental strain (*Mat* a *his3**1 leu2**0 met15**0 ura3**0*) | SGD1 |
| 993 (*slt2*) | Mitogen-Activated Protein Kinase (MAPK) | SGD |
| 2487 (*mkk1*) | MAPK kinase (MAPKK) | SGD |
| 2112 (*mkk2*) | MAPK kinase (MAPKK) | SGD |
| 1328 (*bck1*) | MAPKK kinase (MAPKKK) | SGD |
| 1784 (*wsc1*) | Sensor-transducer: stress-activated PKC1-MPK1 pathway | SGD |
| 5241 (*mid2*) | Sensor for cell wall integrity signaling | SGD |
| 5280 (*rom2*) | GDP/GTP exchange protein | SGD |
| 5251 (*fks1*) | -1,3-D-glucan synthase; Target of caspofungin | SGD |
| 2739 (*rlm1*) | MADS-box transcription factor | SGD |
| 6109 (*swi4*) | Transcription factor | SGD |
| 23133 (*pkc1*) | Protein serine/threonine kinase | SGD |

1 SGD, *Saccharomyces* Genome Database (www.yeastgenome.org, Accessed 1 May 2018).
