# Supplementary figures and images for: Octyl Gallate as an Intervention Catalyst to Augment Antifungal Efficacy of Caspofungin
Source: Preprints.org preprint supplement (doi:10.20944/preprints201805.0055.v1), 2018-05-03

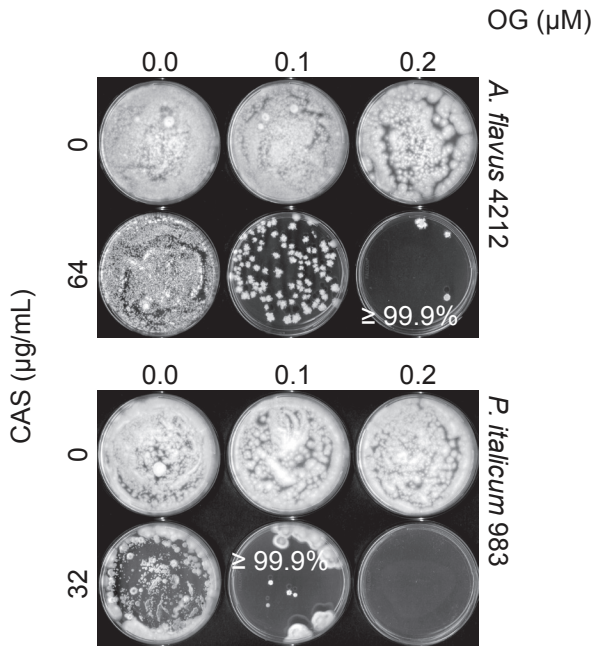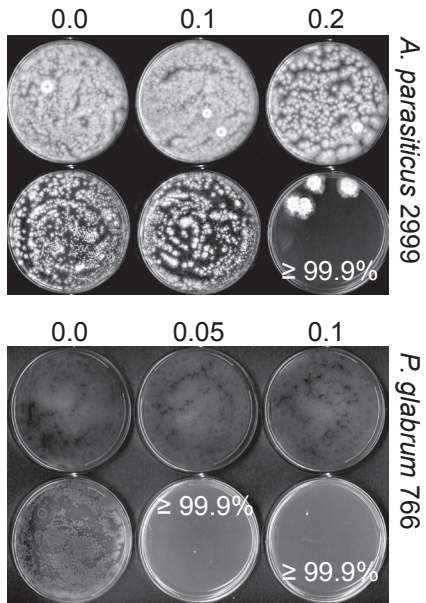

Supplement: Supplementary file 1 [file supplementary]
